# Supplementary material
Source: publisher figshare collection journal article supplement (https://gsapubs.figshare.com/ndownloader/files/22408533)
Supplement: Supplementary file 1 [file 22408533]

## Sheet: Sheet1
Spot Name	Date/Time	Hours	204 cts /sec	204 /206	% err	207 /206	% err	208 /206	% err	Obs 206 /238	% err	248 /254	% err	254 /238	% err	238 /196	Pb/U: UO/U^2	% err	% comm 206	ppm U	ppm Th	232Th /238U	Ln UO/U	Ln Pb/U	Corr 206 /238	% err	ppm Rad 206Pb	Total 208Pb /232Th	% err	Age S-K comm Pb	C-Pb 206 /204	C-Pb 207 /206	C-Pb 208 /206	204corr 206Pb /238U Age	1s err	207corr 206Pb /238U Age	1s err	208corr 206Pb /238U Age	1s err	204corr 207Pb /206Pb Age	1s err	204corr 208Pb /232Th Age	1s err	% Dis- cor- dant	4corr 208r /232	% err	7corr 206Pbr /238U	1s err	8corr 206Pbr /238U
10JS05-2.1	26 Jul, 2011 10:45	1.004	0.0799865	0.000411579	48.6505	0.0502997	4.02628	0.147881	3.45239	0.0339915	4.12652	0.396528	0.391196	5.059	0.463985	0.168684	0.00131992	1.14903	0.20368	177.89	73.5686	0.42732	1.62117	-3.3891	0.0207961	1.14903	3.17818	0.00719685	3.65955	132.424	18.5012	0.844218	2.07468	131.685	1.57115	132.418	1.54795	131.836	1.65496	-99.0998	200.918	129.509	8.8959	-175.255	0.00642802	6.86895	0.0207538	0.000245109	0.0206616
10JS05-9.1	26 Jul, 2011 13:34	3.816	0.0406717	0.000217378	50.0109	0.0517896	4.11013	0.190188	3.12752	0.0353143	4.87796	0.492823	1.85591	5.14262	0.550236	0.155091	0.00132305	1.184	0.390789	165.334	85.2776	0.532948	1.63756	-3.3474	0.0208455	1.184	2.96087	0.00743897	3.82461	132.496	18.501	0.844223	2.07468	132.468	1.57376	132.483	1.5975	131.52	1.76941	128.086	129.469	143.253	5.81212	-3.3083	0.00711261	4.05725	0.0207641	0.000252958	0.0206116
10JS05-1.1	26 Jul, 2011 10:26	0.679	0.282337	0.000453812	31.63	0.0507846	2.28049	0.270734	1.4661	0.0344492	3.60836	0.800764	0.301853	5.06826	0.464039	0.564354	0.00133271	0.645427	0.261497	595.873	497.844	0.863281	1.623	-3.37649	0.0209978	0.645427	10.7491	0.00658512	1.63007	133.62	18.4993	0.844297	2.07477	132.846	0.915516	133.612	0.878069	134.154	1.03656	-106.978	136.198	124.155	3.35998	-180.528	0.00616145	2.70629	0.0209428	0.000139063	0.0210286
10JS05-3.1	26 Jul, 2011 11:04	1.319	0.0752681	0.000398792	66.6739	0.0483352	4.30635	0.178861	3.23714	0.0361845	3.33711	0.485035	2.08426	5.17702	0.411304	0.155701	0.00134285	1.21108	-0.0500647	166.717	84.7529	0.525277	1.64423	-3.32635	0.0211574	1.21108	3.0303	0.00720428	4.03608	135.032	18.4971	0.84439	2.07487	133.981	1.72906	135.033	1.66142	134.091	1.82905	-201.566	265.327	132.718	9.47095	-250.443	0.0065878	7.13617	0.021168	0.000263184	0.0210186
10JS05-4.1	26 Jul, 2011 11:42	1.946	0.11864	0.000201794	40.8294	0.0472366	2.39337	0.197839	1.71837	0.0360241	4.01102	0.577497	0.710289	5.16227	0.510723	0.492311	0.00134307	0.661798	-0.188686	526.151	318.27	0.625026	1.64138	-3.32722	0.0211609	0.661798	9.56506	0.00669805	1.97365	135.234	18.4968	0.844404	2.07489	134.49	0.902954	135.241	0.908977	134.995	1.01527	-96.765	92.5975	129.666	3.22017	-171.95	0.00643585	2.48344	0.0212008	0.000143995	0.0211618
10JS05-6.1	26 Jul, 2011 12:19	2.571	0.076705	0.000274099	46.63	0.0494165	3.39927	0.199351	3.8424	0.0348102	3.69879	0.565488	1.57532	5.05807	0.432477	0.23965	0.00135058	0.958477	0.0842949	252.699	149.031	0.609378	1.62099	-3.3628	0.0212793	0.958477	4.6196	0.0069613	4.26196	135.626	18.4962	0.84443	2.07492	135.055	1.31795	135.623	1.32185	135.28	1.54256	-35.988	135.888	132.841	6.29402	-126.647	0.00659397	4.738	0.0212614	0.000209411	0.0212071
10JS05-5.1	26 Jul, 2011 12:00	2.256	2.26719e-30	1e-32	0	0.0486773	3.83887	0.144657	4.83697	0.0354491	4.63816	0.412404	1.64996	5.09507	0.507089	0.195405	0.0013567	1.07613	-0.0105235	207.038	89.1854	0.445099	1.62827	-3.33966	0.0213756	1.07613	3.80201	0.00694709	5.22271	136.358	18.4951	0.844478	2.07497	136.344	1.45183	136.358	1.49139	136.085	1.6436	132.318	90.265	139.931	6.93389	-2.95262	0.00694709	4.95524	0.0213779	0.000236298	0.0213345
10JS05-7.1	26 Jul, 2011 12:57	3.201	-0.027569	-3.27697e-05	78.2118	0.0483345	2.01722	0.34085	1.14966	0.0375491	3.97885	0.991757	0.437609	5.22922	0.599878	0.682804	0.00136242	0.559346	-0.0552519	735.97	766.67	1.07637	1.65426	-3.28152	0.0214658	0.559346	13.5722	0.00679749	1.35133	136.986	18.4941	0.84452	2.07502	136.995	0.760776	136.988	0.778863	136.91	0.974064	139.037	50.2612	137.431	1.80099	1.49049	0.00682257	1.31047	0.0214776	0.000123416	0.0214653
10JS05-8.1	26 Jul, 2011 13:15	3.507	0.0775379	0.000154863	46.5617	0.0477421	2.56403	0.165725	2.01	0.036903	4.48634	0.478762	0.669156	5.16986	0.580936	0.401717	0.00136874	0.718668	-0.131599	429.747	215.579	0.518329	1.64285	-3.30226	0.0215654	0.718668	7.96184	0.0068951	2.23704	137.716	18.493	0.844568	2.07507	137.152	0.991206	137.721	1.00495	137.427	1.09366	-31.2809	86.8121	133.923	3.68316	-122.808	0.00664784	2.75021	0.0215937	0.00015926	0.0215472
10JS05-10.1	26 Jul, 2011 14:13	4.476	0.150491	6.81536e-05	49.2055	0.0500353	1.4603	0.502153	1.23853	0.037872	3.73265	1.46093	1.803	5.18568	0.337563	1.76799	0.00139876	0.342771	0.149758	1895.17	2902.92	1.5827	1.6459	-3.27477	0.0220384	0.342771	35.8816	0.00699225	2.2141	140.323	18.489	0.844741	2.07526	140.351	0.483262	140.318	0.494385	140.428	1.16278	149.39	42.1948	140.106	1.83639	6.44045	0.00695583	1.31071	0.0220054	7.8379e-05	0.0220228
10JS04-10.1	30 Jul, 2010 20:04	21.375	0.0685026	0.000217318	50.0066	0.0538107	3.19538	0.167916	2.57169	0.0553275	3.39993	0.472016	0.370877	5.04385	0.651329	0.217572	0.0021568	0.972805	0.487517	197.075	96.9573	0.508348	1.61817	-2.89842	0.0302569	0.972805	5.12271	0.00999435	2.77444	191.251	18.41	0.848137	2.07908	191.398	1.87177	191.233	1.8874	191.423	2.04665	223.56	107.567	191.095	7.2436	16.8035	0.00949926	3.79058	0.0301094	0.000301599	0.0301398
10JS04-4.2	30 Jul, 2010 17:59	19.293	0.0314052	0.000104597	63.8387	0.05364	3.19656	0.134552	3.37561	0.0629379	3.34144	0.389677	0.675797	5.35828	1.09876	0.171844	0.00217469	1.00555	0.461753	161.993	66.6596	0.425185	1.67864	-2.7675	0.0305079	1.00555	4.24573	0.00965435	3.58644	192.862	18.4075	0.848245	2.07921	193.359	1.92922	192.845	1.96398	193.694	2.10394	290.112	86.7235	188.449	7.5951	50.0383	0.00936711	4.03033	0.030367	0.000313915	0.0305027
10JS04-4.1	30 Jul, 2010 17:41	18.994	0.100543	0.000394561	44.7315	0.054218	4.5648	0.156714	4.94364	0.0600835	3.53706	0.458136	1.28962	5.22522	0.453115	0.147061	0.00219651	1.10029	0.529332	136.35	65.6024	0.49714	1.6535	-2.81917	0.0308139	1.10029	3.60948	0.00971352	5.22622	194.64	18.4047	0.848364	2.07934	194.241	2.19301	194.62	2.20375	195.661	2.43382	119.3	175.96	176.641	12.2971	-38.5812	0.0087776	6.96166	0.0306508	0.000352335	0.0308172
10JS04-8.1	30 Jul, 2010 19:28	20.776	0.126685	0.000390006	44.7295	0.0503694	3.17034	0.152428	2.65341	0.0588205	4.23059	0.41804	0.403956	5.1597	0.544475	0.211785	0.00219233	0.962708	0.0457518	194.73	85.2591	0.452398	1.64088	-2.84033	0.0307554	0.962708	5.14514	0.0103625	2.85142	195.188	18.4039	0.848401	2.07938	193.893	1.93601	195.186	1.90031	194.318	2.03354	-77.4498	167.607	188.064	10.5731	-139.945	0.0093479	5.62205	0.0307413	0.000303848	0.0306026
10JS04-3.1	30 Jul, 2010 17:03	18.357	0.0309913	0.000107713	64.1751	0.0511455	3.3549	0.172619	2.64595	0.060308	3.02271	0.501244	0.38849	5.2243	0.845546	0.162946	0.0021946	1.02428	0.142922	151.06	79.5155	0.543896	1.65332	-2.81024	0.0307871	1.02428	3.99541	0.00977107	2.86377	195.203	18.4039	0.848402	2.07938	195.091	1.98296	195.198	2.0229	195.378	2.20477	174.5	94.0582	191.865	6.22261	-10.5548	0.00953774	3.24322	0.0307431	0.000323449	0.030772
10JS04-2.2	30 Jul, 2010 16:26	17.744	0.123452	0.000385577	44.7295	0.0498028	3.2207	0.141241	2.73352	0.0635055	1.96673	0.403684	0.401212	5.36928	0.413123	0.181293	0.00219462	0.977037	-0.0261361	171.132	72.9845	0.440669	1.68069	-2.76361	0.0307875	0.977037	4.52636	0.00986782	2.93048	195.524	18.4034	0.848424	2.07941	194.109	1.96204	195.525	1.93104	195.262	2.05604	-105.368	169.319	177.83	10.6301	-154.283	0.00883694	5.9777	0.0307955	0.000308778	0.0307535
10JS04-7.1	30 Jul, 2010 19:10	20.479	0.0693038	0.000238847	50.0071	0.0519538	3.30666	0.149046	2.80567	0.0639726	3.26611	0.410578	0.420062	5.36628	0.811907	0.157558	0.00220611	1.02562	0.241947	148.673	64.4809	0.448139	1.68014	-2.75362	0.0309487	1.02562	3.95291	0.0102932	3.01664	196.024	18.4026	0.848457	2.07945	195.632	2.01986	196.015	2.034	195.725	2.17516	120.685	120.102	194.352	8.60904	-38.3102	0.00966196	4.42961	0.0308738	0.000325266	0.0308274
10JS04-3.2	30 Jul, 2010 17:20	18.644	3.06439e-30	1e-32	0	0.051293	3.29032	0.14777	2.76649	0.0644767	2.47682	0.405621	0.482707	5.39037	0.425447	0.161429	0.00221224	1.00263	0.157291	152.777	65.526	0.443169	1.68461	-2.74145	0.0310346	1.00263	4.0733	0.0103482	2.9819	196.721	18.4015	0.848504	2.0795	197.02	1.9455	196.715	1.99579	196.231	2.13066	254.018	75.6632	208.085	6.12306	28.9299	0.0103482	2.94257	0.0309858	0.000319191	0.0309083
10JS04-6.1	30 Jul, 2010 18:52	20.187	0.0612871	0.000171495	50.0058	0.0499881	3.06038	0.146535	2.56055	0.0615447	2.88739	0.406366	0.377335	5.26345	0.386801	0.203785	0.00221176	0.922765	-0.0068816	189.853	81.1508	0.441661	1.66079	-2.79109	0.0310278	0.922765	5.06071	0.0102945	2.74778	196.991	18.4011	0.848522	2.07952	196.366	1.80976	196.991	1.83807	196.265	1.95943	72.4435	99.7231	197.786	7.10843	-63.1079	0.00983347	3.59401	0.03103	0.000293978	0.0309138
10JS04-9.1	30 Jul, 2010 19:46	21.075	0.0445483	0.000150293	50.007	0.0485264	3.38199	0.157224	2.70865	0.0588439	3.31122	0.430244	0.402874	5.13445	0.787573	0.210953	0.00221333	1.0094	-0.191268	193.338	87.0294	0.465115	1.63597	-2.83558	0.0310499	1.0094	5.15729	0.0104959	2.91856	197.48	18.4003	0.848555	2.07956	196.579	1.97199	197.487	2.01392	196.07	2.15706	13.6781	103.119	203.359	7.03536	-93.0419	0.010112	3.45957	0.0311093	0.000322128	0.0308826
10JS04-5.1	30 Jul, 2010 18:17	19.589	0.123639	0.000350368	44.7286	0.0484436	3.09462	0.150801	2.7985	0.062003	3.57579	0.428504	0.373118	5.25781	1.22719	0.205821	0.00222132	0.927926	-0.203595	191.614	86.3455	0.465613	1.65971	-2.78692	0.0311619	0.927926	5.12975	0.0100926	2.97184	198.205	18.3992	0.848604	2.07961	196.56	1.87903	198.213	1.85762	197.429	1.99551	-153.094	159.627	185.01	9.754	-177.886	0.00919539	5.27215	0.0312254	0.000297161	0.0310999
10JS04-1.1	30 Jul, 2010 15:31	16.83	-0.0845242	-0.000300513	50.0072	0.0510303	3.4148	0.133068	2.99218	0.0596585	4.02004	0.361559	0.583823	5.15133	0.827181	0.161342	0.00223369	1.03055	0.119115	148.19	56.0967	0.391138	1.63925	-2.81371	0.0313355	1.03055	3.98934	0.0106606	3.21808	198.673	18.3985	0.848636	2.07965	199.984	2.09768	198.668	2.07191	197.938	2.18732	429.047	112.078	232.748	11.8385	114.54	0.0115817	5.08642	0.0312982	0.000331464	0.0311814
10JS04-1.2	30 Jul, 2010 15:49	17.121	0.173295	0.000504464	37.8062	0.0521612	3.02672	0.150602	2.88552	0.0634405	2.055	0.413656	0.386801	5.28704	0.40075	0.196136	0.00226278	0.944599	0.254533	183.267	79.8191	0.450023	1.66526	-2.7668	0.0317436	0.944599	4.99786	0.0106231	3.06073	200.956	18.3949	0.848789	2.07982	199.611	1.97821	200.947	1.91982	200.572	2.06421	-71.9999	178.325	186.339	11.8182	-136.07	0.00926176	6.34229	0.0316628	0.000307242	0.0316029
10JS03-6.1	30 Jul, 2010 14:13	15.535	8.18307	0.00853102	6.03446	0.196983	5.6268	0.568496	7.36858	0.0397633	5.49352	0.471521	3.52541	4.99838	1.24987	0.766841	0.00154382	0.605603	18.7137	690.462	338.694	0.506851	1.60911	-3.39202	0.0216576	0.605603	12.8468	0.0242917	8.19092	113.164	18.5308	0.842948	2.07326	116.484	1.44779	112.5	2.04155	108.921	3.71566	1086.87	416.427	206.856	23.9041	833.066	0.0102868	11.5559	0.0176047	0.000322271	0.01704
10JS03-8.1	30 Jul, 2010 14:54	16.217	0.110342	0.000202154	40.802	0.0518804	3.09752	0.135624	3.0236	0.03548	5.16485	0.380168	1.35151	5.03936	0.287274	0.406396	0.00133705	0.806814	0.436757	367.895	145.751	0.409354	1.61728	-3.34244	0.0187569	0.806814	5.92829	0.00621441	3.40877	119.29	18.5214	0.843351	2.07371	119.351	0.970302	119.277	0.986239	119.435	1.05945	143.319	96.9721	118.071	4.716	20.0826	0.00585865	3.99421	0.018675	0.000155847	0.0187001
10JS03-1.2	30 Jul, 2010 11:06	12.417	0.165173	0.000469003	45.8355	0.0514324	3.00572	0.185983	2.27289	0.0462935	1.9386	0.530663	1.76237	5.65408	1.06219	0.386461	0.00144495	0.883024	0.355242	377.461	214.101	0.586082	1.73238	-3.08126	0.0202706	0.883024	6.57328	0.00643253	3.00861	128.922	18.5066	0.843987	2.07442	128.254	1.22649	128.911	1.15802	129.343	1.2979	-83.3277	196.274	117.089	6.4293	-164.971	0.00580979	5.49095	0.0201986	0.000183266	0.020267
10JS03-2.1	30 Jul, 2010 11:26	12.739	-0.0100989	-1.79242e-05	54.7761	0.0495942	2.48288	0.0772021	2.78737	0.0431697	2.13694	0.226506	0.982988	5.45546	0.260412	0.623173	0.00144832	0.707446	0.122583	594.462	142.758	0.248136	1.69662	-3.14229	0.0203179	0.707446	10.3764	0.00632147	3.03911	129.511	18.5056	0.844026	2.07446	129.708	0.908726	129.508	0.931675	129.755	0.955629	188.362	57.8507	128.5	3.7474	45.2207	0.00637781	2.91625	0.020293	0.000147459	0.0203321
10JS03-7.1	30 Jul, 2010 14:33	15.862	0.137141	0.000225201	44.7256	0.0500413	2.32927	0.0809303	5.85838	0.0435104	3.41132	0.247087	5.87361	5.36832	0.925437	0.469018	0.00149895	0.671822	0.167252	442.68	115.553	0.269714	1.68052	-3.13883	0.0210281	0.671822	7.99712	0.00630968	8.32293	133.934	18.4988	0.844318	2.07479	133.597	0.920503	133.928	0.914632	134.449	1.03298	34.8653	97.1851	113.592	9.04863	-73.9027	0.00563579	7.9659	0.0209929	0.000144861	0.0210755
10JS03-4.1	30 Jul, 2010 13:18	14.62	-0.122639	-0.000145813	50.0024	0.0499936	1.98051	0.0589305	2.574	0.0449921	2.57242	0.153942	0.477429	5.44186	0.58471	0.631176	0.00151114	0.571303	0.158398	601.105	98.0531	0.168548	1.69412	-3.09864	0.0211992	0.571303	10.9475	0.00741201	2.67952	135.024	18.4971	0.84439	2.07487	135.591	0.786517	135.019	0.784029	134.863	0.791598	291.134	63.6599	163.378	8.29877	114.714	0.00811587	5.0795	0.0211656	0.000124197	0.0211409
10JS03-2.2	30 Jul, 2010 11:45	13.056	0.0720838	0.000102777	62.946	0.0498397	2.18416	0.0525787	2.95999	0.0467332	0.580043	0.142487	0.473897	5.56189	0.391829	0.815533	0.00152181	0.630153	0.136514	787.943	119.554	0.156776	1.71594	-3.06516	0.0213489	0.630153	14.4515	0.00715987	3.0632	135.996	18.4956	0.844454	2.07494	135.919	0.862013	135.991	0.870842	135.98	0.876388	115.275	70.7298	133.419	7.9222	-15.1889	0.00662276	5.93782	0.0213198	0.000137969	0.021318
10JS03-1.1	30 Jul, 2010 10:48	12.107	0.145349	0.000150104	44.7241	0.0492507	1.84802	0.0548512	2.44962	0.0505854	1.36454	0.158241	0.824224	5.84461	0.994526	0.862024	0.00152582	0.612637	0.0613024	860.567	146.687	0.176124	1.76552	-2.98681	0.021405	0.612637	15.825	0.00666629	2.65618	136.449	18.4949	0.844484	2.07498	136.155	0.841461	136.447	0.844424	136.591	0.855886	51.0991	68.4335	120.232	7.01047	-62.4698	0.0059662	5.83079	0.0213919	0.000133793	0.0214147
10JS03-3.2	30 Jul, 2010 12:41	13.991	-0.011916	-2.68564e-05	50.0047	0.049727	2.75404	0.133461	2.39283	0.0438174	2.94762	0.393779	0.401522	5.33142	0.887317	0.364809	0.00153081	0.789432	0.120208	342.758	142.37	0.429185	1.67362	-3.12724	0.0214751	0.789432	6.32365	0.00667802	2.55148	136.813	18.4944	0.844508	2.075	137.039	1.07092	136.809	1.09767	137.142	1.16874	200.633	64.0689	135.564	3.45516	46.4055	0.00672959	2.54873	0.0214493	0.000173929	0.0215021
10JS03-3.1	30 Jul, 2010 12:23	13.695	0.851512	0.000180988	18.8995	0.0501699	0.813359	0.153504	6.82064	0.0454244	11.009	0.323938	10.3897	5.26326	2.56214	3.20812	0.00155465	0.270201	0.17053	2988.72	1018.36	0.352071	1.66075	-3.09498	0.0218095	0.270201	55.9984	0.00950906	12.4314	138.853	18.4912	0.844643	2.07516	138.622	0.38017	138.848	0.379165	136.137	1.43268	74.5446	32.5564	182.676	12.578	-46.2244	0.00907884	6.88544	0.0217724	6.00985e-05	0.0213428
10JS03-3.3	30 Jul, 2010 12:59	14.291	0.0628953	7.36836e-05	50.0024	0.0473814	2.01671	0.0810299	2.23419	0.0440855	1.80671	0.245543	0.249275	5.28572	0.521537	0.759251	0.00157021	0.569358	-0.184725	709.317	183.369	0.267115	1.66501	-3.12296	0.0220278	0.569358	13.4232	0.00668218	2.31903	140.71	18.4884	0.844766	2.07529	140.27	0.795395	140.716	0.812818	140.705	0.83476	12.9387	57.181	129.931	3.80833	-90.7758	0.00644904	2.93104	0.0220685	0.000128871	0.0220669
10JS03-5.1	30 Jul, 2010 13:55	15.231	0.0307569	7.39504e-06	64.4232	0.109272	0.628359	0.161312	3.59573	0.580454	3.33173	0.527407	3.57144	5.26122	0.749537	0.233252	0.0208052	0.522956	0.99551	217.245	120.508	0.573162	1.66036	-0.544079	0.291867	0.522956	54.4726	0.0821437	5.0949	1634.18	15.893	0.9656	2.2353	1650.68	7.61676	1636.34	8.4078	1654.92	9.99227	1785.63	11.5153	1593.14	57.9118	8.17553	0.0820099	3.63509	0.288962	0.00168114	0.292682
11MK02-1.1	26 Jul, 2011 15:37	0.317	0.0503955	7.74538e-05	50.0032	0.0496156	2.27884	0.115297	2.34952	0.0252734	3.8506	0.325396	0.808309	5.08741	0.739836	0.91164	0.000969679	0.618696	0.22037	904.855	307.449	0.35108	1.62677	-3.6794	0.0145114	0.618696	11.2806	0.00476564	2.56055	92.6769	18.5623	0.841605	2.07177	92.7419	0.573318	92.6713	0.585583	92.6923	0.618568	122.529	61.6178	93.6185	2.592	32.1178	0.00464252	2.76868	0.0144795	9.21539e-05	0.0144828
11MK02-8.1	26 Jul, 2011 18:31	3.217	0.094196	0.000223443	40.8324	0.0471006	2.83449	0.355535	1.58562	0.0338648	3.9445	1.03055	0.259048	4.92718	0.880903	0.471692	0.00138408	0.781277	-0.19846	458.397	489.981	1.10446	1.59477	-3.38942	0.020713	0.781277	8.15695	0.00666768	1.78653	132.414	18.5012	0.844217	2.07468	131.62	1.04043	132.42	1.05087	131.726	1.31861	-122.392	107.453	131.092	2.66958	-192.989	0.00650684	2.03642	0.0207541	0.000166399	0.0206442
11MK02-14.1	26 Jul, 2011 21:06	5.804	0.0480787	0.00021863	50.0093	0.0507408	3.86007	0.073006	4.51506	0.0377256	2.86213	0.211095	0.488544	5.1945	0.38658	0.218368	0.00139092	1.09772	0.258994	219.743	48.6532	0.228775	1.6476	-3.28137	0.0208154	1.09772	3.92957	0.00664256	4.6722	132.475	18.5011	0.844221	2.07468	132.276	1.46044	132.467	1.48027	132.771	1.51146	75.3507	127.338	118.48	9.46908	-43.035	0.00587901	7.99214	0.0207615	0.000234394	0.0208097
11MK02-13.1	26 Jul, 2011 20:48	5.513	0.0669822	0.000171916	53.3616	0.0503217	2.97094	0.11502	3.72114	0.0376788	1.25488	0.340671	5.04372	5.19535	0.492222	0.390056	0.0013913	0.852202	0.20604	392.555	140.271	0.369217	1.64776	-3.28177	0.020821	0.852202	7.02178	0.00648626	6.32552	132.579	18.5009	0.844228	2.07469	132.425	1.13803	132.572	1.14914	132.971	1.2835	88.8146	100.276	123.204	6.17772	-32.932	0.00611414	5.01421	0.0207781	0.000181965	0.0208414
11MK02-12.1	26 Jul, 2011 20:13	4.926	0.0233765	3.1924e-05	64.3469	0.0491383	2.12774	0.0547484	3.55595	0.0363575	3.80821	0.153224	2.09547	5.07297	0.781741	0.739186	0.00140153	0.597881	0.054249	732.309	117.096	0.165219	1.62393	-3.31493	0.0209742	0.597881	13.1955	0.00695021	4.17052	133.74	18.4991	0.844305	2.07478	133.732	0.792844	133.738	0.813073	133.651	0.825796	131.89	52.6169	136.871	5.33186	-1.37723	0.00679466	3.89554	0.0209629	0.000128772	0.0209491
11MK02-11.1	26 Jul, 2011 19:56	4.635	0.571198	0.000904494	21.8308	0.0591924	2.50633	0.0695544	6.69756	0.0382957	3.83934	0.11496	1.31797	5.17233	0.782615	0.618337	0.00141951	0.646722	1.31795	620.477	74.7465	0.124474	1.64332	-3.27888	0.0212432	0.646722	11.3237	0.0118705	6.85657	133.784	18.4991	0.844308	2.07478	133.264	0.977739	133.741	0.894967	133.523	0.939995	-11.2079	175.277	119.82	27.4353	-108.41	0.00594571	22.8971	0.0209633	0.000141742	0.0209287
11MK02-10.1	26 Jul, 2011 19:38	4.344	0.0280963	7.75996e-05	65.7712	0.0511975	3.06784	0.121502	3.37323	0.0342272	2.47433	0.33763	2.55214	4.918	0.777566	0.376343	0.0014089	0.882003	0.312142	365.286	127.872	0.361707	1.5929	-3.37614	0.0210844	0.882003	6.61664	0.00708251	4.32089	134.1	18.4986	0.844329	2.0748	134.315	1.1788	134.09	1.20377	134.033	1.29247	197.656	80.8903	139.164	5.37034	47.1586	0.0069089	3.859	0.0210186	0.000190659	0.0210096
11MK02-9.1	26 Jul, 2011 19:03	3.758	0.209517	0.000468012	40.2326	0.0530662	3.55717	0.122548	3.87783	0.0385557	2.84041	0.316056	4.06312	5.19589	0.499264	0.432783	0.00141247	0.8856	0.546956	435.585	144.404	0.342546	1.64787	-3.26414	0.0211379	0.8856	7.91003	0.00756217	5.68602	134.131	18.4985	0.844331	2.07481	133.688	1.25644	134.113	1.22157	133.888	1.33415	5.77397	176.758	130.025	10.381	-95.681	0.00645373	7.98386	0.0210223	0.00019348	0.0209866
11MK02-5.1	26 Jul, 2011 17:12	1.9	0.0503156	0.000155899	50.0063	0.0466822	3.27423	0.130507	2.83286	0.0385968	2.91625	0.38382	1.69843	5.23498	0.463453	0.312162	0.00140152	0.904686	-0.25553	315.742	127.323	0.416665	1.65536	-3.2574	0.020974	0.904686	5.68928	0.00656944	3.42465	134.139	18.4985	0.844331	2.07481	133.427	1.20913	134.147	1.23198	133.907	1.31457	-89.8302	106.112	126.3	4.83099	-167.325	0.00626824	3.82502	0.0210276	0.00019513	0.0209896
11MK02-4.1	26 Jul, 2011 16:52	1.576	0.0561981	9.10935e-05	74.7501	0.0482404	2.36825	0.133884	2.15892	0.0374767	3.14017	0.400669	1.41373	5.14363	0.799155	0.61285	0.00140728	0.654939	-0.0604275	612.716	256.948	0.433309	1.63776	-3.28568	0.0210602	0.654939	11.0858	0.00650716	2.66243	134.431	18.4981	0.844351	2.07483	134.129	0.88461	134.433	0.895112	134.581	0.963548	43.9653	77.6611	127.686	3.85421	-67.2215	0.00633724	3.01852	0.0210729	0.00014178	0.0210964
11MK02-15.1	26 Jul, 2011 21:23	6.094	0.0349853	0.000128995	62.7224	0.0486748	5.36736	0.199446	2.53998	0.03755	2.32028	0.566351	0.604917	5.14037	0.396619	0.267979	0.00141501	0.986275	-0.00754313	267.809	158.727	0.612405	1.63712	-3.28441	0.0211759	0.986275	4.87203	0.00689651	2.79109	135.093	18.497	0.844394	2.07488	134.764	1.32976	135.093	1.39452	134.691	1.50624	37.5839	147.316	135.479	4.27928	-72.1114	0.00672532	3.15864	0.0211775	0.000220907	0.0211138
11MK02-3.1	26 Jul, 2011 16:15	0.955	0.0918319	0.000105644	40.828	0.0487704	1.95966	0.0467438	2.80682	0.0361136	3.81705	0.134642	0.295429	5.0309	0.606261	0.81281	0.00141771	0.548078	0.00384488	800.835	112.326	0.144927	1.6156	-3.32299	0.0212164	0.548078	14.5968	0.00684296	2.87505	135.334	18.4967	0.84441	2.07489	135.077	0.740008	135.334	0.754058	135.283	0.755743	59.9959	58.0574	125.922	6.074	-55.5839	0.00624942	4.82364	0.0212156	0.000119455	0.0212075
11MK02-6.1	26 Jul, 2011 17:38	2.34	0.0928969	8.36277e-05	44.7237	0.0485157	1.7302	0.0441498	2.542	0.0343133	4.23254	0.121573	1.23621	4.89569	1.20648	1.20772	0.00141853	0.481309	-0.0284765	1168.73	147.179	0.130121	1.58836	-3.37373	0.0212286	0.481309	21.3146	0.00720283	2.86734	135.453	18.4965	0.844418	2.0749	135.208	0.650316	135.454	0.662773	135.222	0.66325	63.5291	50.6634	134.553	5.8684	-53.014	0.00667922	4.3614	0.0212346	0.000104996	0.0211978
11MK02-7.1	26 Jul, 2011 18:13	2.926	0.0481517	0.000302187	73.3842	0.0477523	4.98401	0.232579	10.1511	0.0382128	1.46581	0.65661	11.6713	5.15546	1.31199	0.146142	0.0014351	1.44097	-0.128844	146.332	100.614	0.710449	1.64006	-3.27005	0.0214765	1.44097	2.6999	0.00703075	15.5351	137.151	18.4939	0.844531	2.07503	136.223	2.01667	137.155	2.00416	136.422	3.43393	-151.798	233.927	134.573	14.7397	-211.434	0.00668019	10.953	0.0215042	0.000317581	0.021388
11MK02-2.1	26 Jul, 2011 15:55	0.619	0.0402655	0.000285688	50.0146	0.0485745	4.91279	0.207864	3.50205	0.0373729	3.33027	0.577196	0.41905	5.12156	0.667298	0.136622	0.00145128	1.5955	-0.0291599	136.206	82.2087	0.623643	1.63346	-3.29198	0.0217187	1.5955	2.54139	0.00723898	3.87112	138.548	18.4917	0.844623	2.07513	137.785	2.20355	138.549	2.23322	137.749	2.48507	-91.4021	177.25	138.126	6.56384	-166.337	0.0068572	4.75206	0.021725	0.000353954	0.0215983
[truncated: 14 more columns]
